# Supplementary material for: Mechanistic insights into excited state intramolecular proton transfer in isolated and metal chelated supramolecular chemosensors
Source: Royal Society of Chemistry journal article supplement (doi:10.1039/c6dt03906e), 2016-01-01

*Electronic supplementary information for:*

**Mechanistic Insights into Excited State Intramolecular Proton Transfer in  
Isolated and Metal Chelated Supramolecular Biosensors.**

Tolga N. V. Karsili<sup>a,b\*</sup>, Barbara Marchetti<sup>a,b</sup> and Michael N. R. Ashfold<sup>b</sup>

<sup>a</sup>*Department of Chemistry, Technische Universität München, Lichtenbergstrasse 4, 85748, Garching  
Germany.*

<sup>b</sup>*School of Chemistry, University of Bristol, Cantock's Close, Bristol, BS8 1TS, United Kingdom.*

**Figure S1:** Minimum energy geometries and dominant orbital excitation accompanying the lowest three singlet electronic transitions of  $\text{Cd}^{2+}$ -HDBO' (right) and  $\text{Hg}^{2+}$ -HDBO' (left).

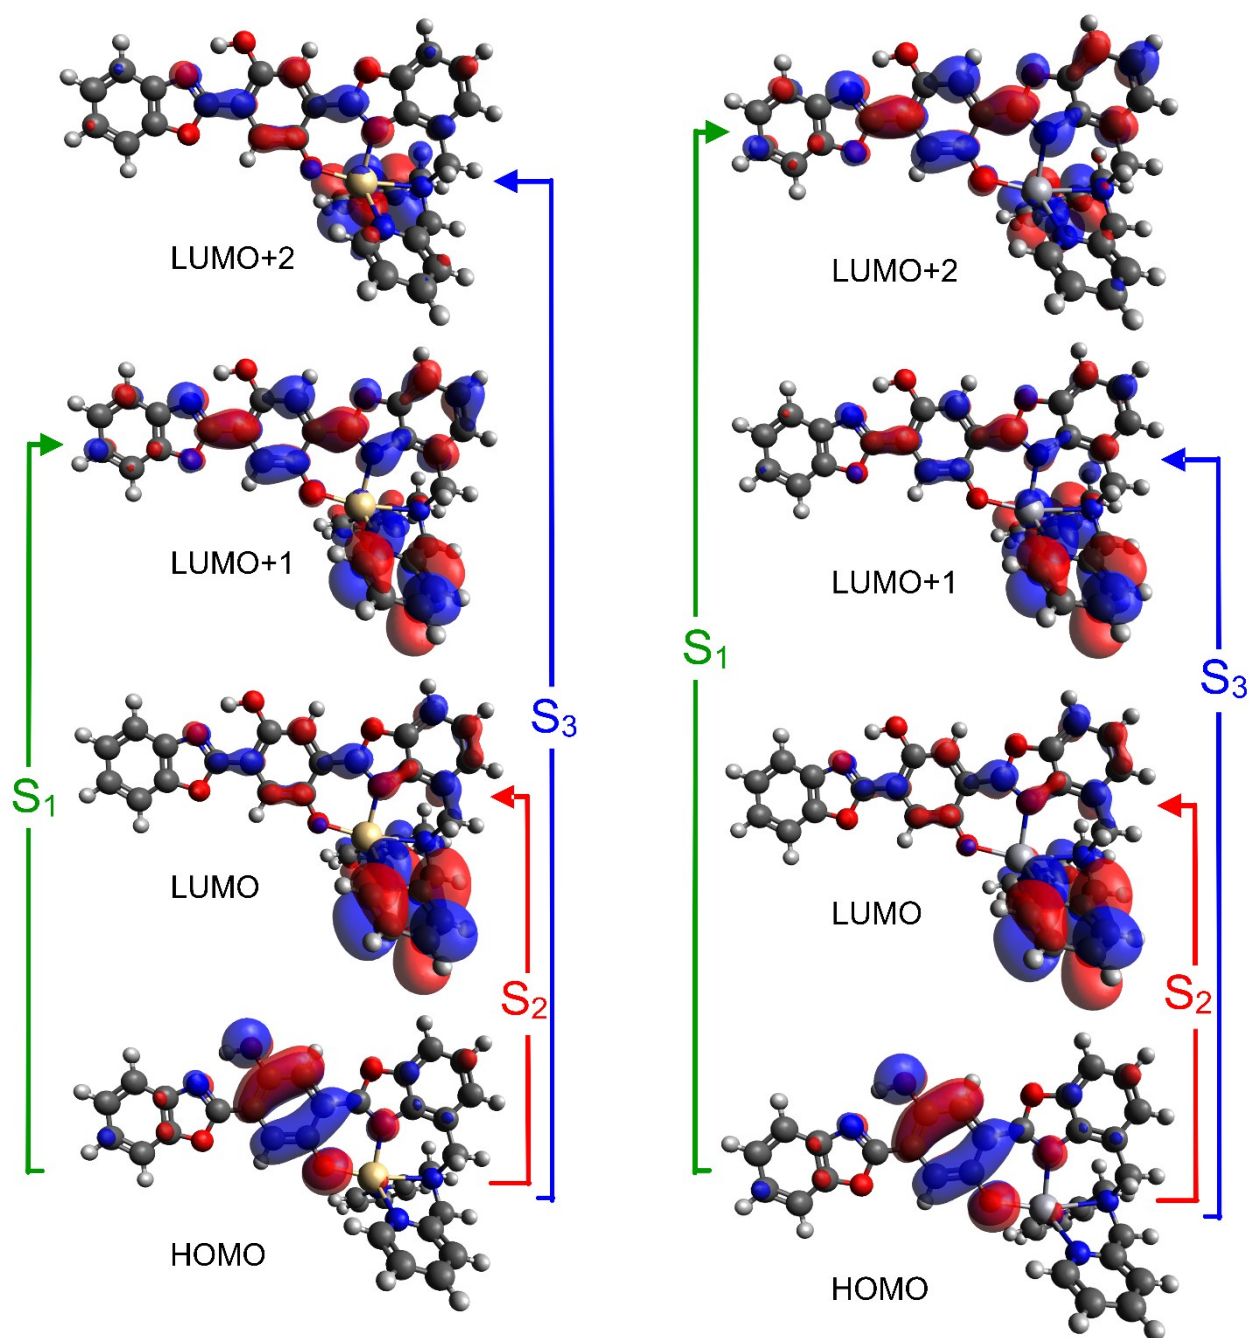

**Figure S2:** Magnitude and direction of the permanent dipole moment of HBO at the minimum energy geometries of (a) the  $S_0$  state, (b) the  $S_1$  *enol* conformer and (c) the  $S_1$  *keto* minimum at planar geometries.

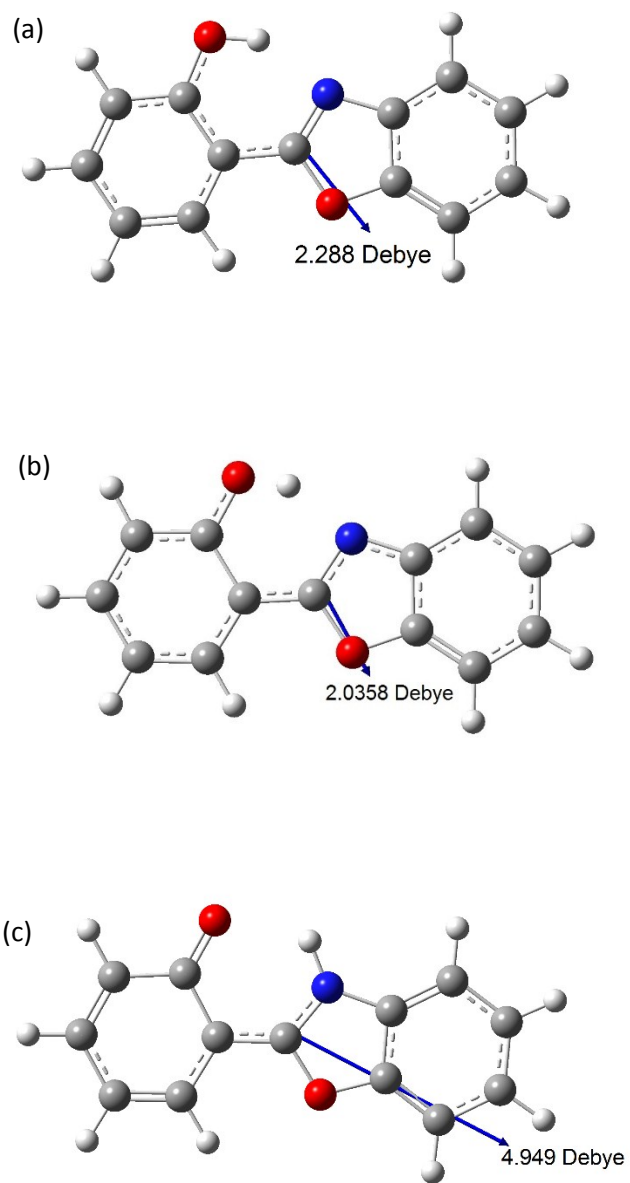

Supplement: c6dt03906e1.pdf [file c6dt03906e1.pdf]
